# Supplementary material
Source: PubMed Central journal article supplement (PMC7165505)
Supplement: HEP-61-437-s001.pdf [file HEP-61-437-s001.pdf]

**Supporting Table 1. Clinicopathologic features between the two groups of patients with HCV-high and HCV-low loads used in this study.**

|                          |           | High (no.=9) | Low (no.=8)  | <i>P</i> |
|--------------------------|-----------|--------------|--------------|----------|
| HCV RNA (mean±SE)        |           | 69,910±8,729 | 64±17        | 0.00008  |
| Male / female            |           | 5 / 4        | 8 / 0        |          |
| Age (range)              |           | 68.9 (60-77) | 62.5 (50-70) |          |
| Stage                    | I         | 2            | 2            |          |
|                          | II        | 7            | 5            |          |
|                          | IIIA      | 0            | 1            |          |
| Liver function (mean±SE) |           |              |              |          |
| ICG-R15 (%)              | (<10)     | 14.1±2.54    | 12.4±2.18    |          |
| Alb (g/dL)               | (6.7-8.3) | 4.02±0.16    | 3.99±0.21    |          |
| AST (IU/L)               | (8-38)    | 62.1±19.7    | 37.6±6.04    |          |
| ALT (IU/L)               | (40-44)   | 52.0±14.2    | 42.8±13.6    |          |
| T.bil (mg/dL)            | (0.3-1.2) | 0.79±0.17    | 0.59±0.09    |          |
| Fibrosis                 | F1        | 3            | 3            |          |
|                          | F2        | 1            | 4            |          |
|                          | F3        | 4            | 1            |          |
|                          | F4        | 0            | 0            |          |
| HCV genotype             |           |              |              |          |
|                          | 1b        | 7            | 4            |          |
|                          | 1b+2a     | 2            | 0            |          |
|                          | 2a        | 0            | 3            |          |
|                          | 2b        | 0            | 1            |          |

The HCV RNA levels are indicated as an arbitrary unit, the viral copy number per 50 ng of total liver RNA normalized to the 18S rRNA quantity: High, HCV-high load (>30000 units of HCV RNA); Low, HCV-low load (<300 units of HCV RNA). The fibrosis score was determined according to the New Inuyama Classification.<sup>1</sup> HCV genotyping was performed as described previously.<sup>2</sup> HCV RNA, age, ICG-15 (indocyanin green retention at 15 min), Alb (serum albumin), AST (serum aspartate aminotransferase), ALT (serum alanine aminotransferase) and T.bil (total bilirubin) were analyzed by Mann-Whitney U test. Sex and stage were analyzed by Fisher's exact probability test. Fibrosis and HCV genotype were analyzed by the  $\chi^2$  test. Only HCV RNA was significantly different, and other variables were not. There was also no significant correlation between viral loads and all clinicopathologic variables according to a simple logistic regression analysis. To exclude the possible involvement of difference in sex ratio, we performed the same analyses of all variables using only male samples, a 5-to-8 comparison. No significant difference was observed among all of the clinicopathologic variables, but the TMPRSS2 gene and the 13 other genes were significantly different.

**Supporting Table 2. Clinicopathologic features between two groups of patients with HCV-high and HCV-low loads used in the comprehensive analysis of gene expression.**

| Chronic hepatitis without liver cirrhosis |           |               |              |          |
|-------------------------------------------|-----------|---------------|--------------|----------|
|                                           |           | High (no.=5)  | Low (no.=5)  | <i>P</i> |
| HCV RNA (mean±SE)                         |           | 74,665±14,625 | 71±20        | 0.009    |
| Male / female                             |           | 4 / 1         | 5 / 0        |          |
| Age (range)                               |           | 66.6 (62-71)  | 65.2 (58-71) |          |
| Stage                                     | I         | 2             | 2            |          |
|                                           | II        | 3             | 3            |          |
|                                           | IIIA      | 0             | 0            |          |
| Liver function (mean±SE)                  |           |               |              |          |
| ICG-R15 (%)                               | (<10)     | 12.4±2.38     | 8.90±2.25    |          |
| Alb (g/dL)                                | (6.7-8.3) | 4.02±0.24     | 4.18±0.27    |          |
| AST (IU/L)                                | (8-38)    | 51.8±10.8     | 35.0±4.92    |          |
| ALT (IU/L)                                | (40-44)   | 45.8±8.75     | 39.8±13.5    |          |
| T.bil (mg/dL)                             | (0.3-1.2) | 0.66±0.13     | 0.58±0.13    |          |
| Fibrosis                                  | F1        | 2             | 1            |          |
|                                           | F2        | 0             | 3            |          |
|                                           | F3        | 3             | 0            |          |
|                                           | F4        | 0             | (1)          |          |
| HCV genotype                              |           |               |              |          |
|                                           | 1b        | 4             | 5            |          |
|                                           | 1b+2a     | 1             | 0            |          |
|                                           | 2a        | 0             | 0            |          |
|                                           | 2b        | 0             | 0            |          |

| Liver cirrhosis          |           |                |              |          |
|--------------------------|-----------|----------------|--------------|----------|
|                          |           | High (no.=7)   | Low (no.=3)  | <i>P</i> |
| HCV RNA (mean±SE)        |           | 140,287±59,501 | 97±64        | 0.017    |
| Male / female            |           | 5 / 2          | 3 / 0        |          |
| Age (range)              |           | 63.3 (54-69)   | 65.7 (56-73) |          |
| Stage                    | I         | 6              | 2            |          |
|                          | II        | 1              | 1            |          |
|                          | IIIA      | 0              | 0            |          |
| Liver function (mean±SE) |           |                |              |          |
| ICG-R15 (%)              | (<10)     | 28.1±7.61      | 28.3±8.36    |          |
| Alb (g/dL)               | (6.7-8.3) | 3.84±0.11      | 4.00±0.42    |          |
| AST (IU/L)               | (8-38)    | 54.1±4.7       | 53.0±11.1    |          |
| ALT (IU/L)               | (40-44)   | 47.9±7.40      | 48.0±12.86   |          |
| T.bil (mg/dL)            | (0.3-1.2) | 0.94±0.14      | 0.81±0.08    |          |
| Fibrosis                 | F1        | 0              | 0            |          |
|                          | F2        | 0              | 0            |          |
|                          | F3        | (2)            | 0            |          |
|                          | F4        | 5              | 3            |          |
| HCV genotype             |           |                |              |          |
|                          | 1b        | 6              | 2            |          |
|                          | 1b+2a     | 1              | 0            |          |
|                          | 2a        | 0              | 1            |          |
|                          | 2b        | 0              | 0            |          |

The number of the fibrosis score in parentheses indicates a discrepancy between F3 or F4 determined by two pathologists. The statistical analyses were performed as described in Supporting Table 1, and none of the variables, except for HCV RNA, were significantly different between the two groups.

**Supporting Table 3. One hundred thirty genes differentially expressed in the livers with high vs. low HCV loads.**

| No.                                             | Accession No. | Gene symbol        | Fold change | No.                                          | Accession No. | Gene symbol         | Fold change |
|-------------------------------------------------|---------------|--------------------|-------------|----------------------------------------------|---------------|---------------------|-------------|
| Chronic hepatitis liver without liver cirrhosis |               |                    |             | continued                                    |               |                     |             |
| 1                                               | NM_002122     | <i>HLA-DQA1</i>    | 4.17        | 67                                           | AK096893      |                     | -6.03       |
| 2                                               | NM_003733     | <i>OASL</i>        | 3.87        | 68                                           | NM_198462     | <i>FLJ46154</i>     | -4.14       |
| 3                                               | NM_005909     | <i>MAP1B</i>       | 3.30        | 69                                           | NM_021614     | <i>KCNN2</i>        | -3.65       |
| 4                                               | NM_005656     | <i>TMPRSS2</i>     | 3.29        | 70                                           | NM_000567     | <i>CRP</i>          | -3.53       |
| 5                                               | NM_002993     | <i>CXCL6</i>       | 3.21        | 71                                           | NM_000450     | <i>SELE</i>         | -3.45       |
| 6                                               | NM_003311     | <i>PHLDA2</i>      | 3.09        | 72                                           | BF514098      |                     | -3.44       |
| 7                                               | AI763378      | <i>EHF</i>         | 3.07        | 73                                           | AI580142      |                     | -3.24       |
| 8                                               | BC042028      | ---                | 2.99        | 74                                           | N80145        |                     | -3.23       |
| 9                                               | BE675995      | <i>SPEC2</i>       | 2.99        | 75                                           | M27830        |                     | -3.08       |
| 10                                              | AK025180      | ---                | 2.97        | 76                                           | AW975324      |                     | -2.97       |
| 11                                              | BC089425      | <i>LOC129607</i>   | 2.92        | 77                                           | AA018404      |                     | -2.81       |
| 12                                              | NM_003068     | <i>SNAI2</i>       | 2.88        | 78                                           | AK022897      |                     | -2.53       |
| 13                                              | NM_006403     | <i>NEDD9</i>       | 2.84        | 79                                           | NM_003633     | <i>ENC1</i>         | -2.37       |
| 14                                              | NM_001549     | <i>IFIT3/IFIT4</i> | 2.83        | 80                                           | NM_213589     | <i>RAPH1</i>        | -2.34       |
| 15                                              | NM_002353     | <i>TACSTD2</i>     | 2.79        | 81                                           | AL049437      |                     | -2.31       |
| 16                                              | NM_001001887  | <i>IFIT1</i>       | 2.78        | 82                                           | NM_001187     | <i>BAGE</i>         | -2.30       |
| 17                                              | NM_002354     | <i>TACSTD1</i>     | 2.75        | 83                                           | BC022380      | <i>FLJ00310</i>     | -2.20       |
| 18                                              | NM_006417     | <i>IFI44</i>       | 2.72        | 84                                           | AI650260      |                     | -2.13       |
| 19                                              | NM_001565     | <i>CXCL10</i>      | 2.61        | 85                                           | AK000674      | <i>LOC134145</i>    | -2.09       |
| 20                                              | NM_002303     | <i>LEPR</i>        | 2.52        | 86                                           | AB019490      | <i>RABGAP1L</i>     | -2.04       |
| 21                                              | BF724558      |                    | 2.52        | 87                                           | BF511381      | <i>HMGA2</i>        | -2.01       |
| 22                                              | NM_152878     | <i>MAFF</i>        | 2.48        | Chronic hepatitis liver with liver cirrhosis |               |                     |             |
| 23                                              | NM_004030     | <i>IRF7</i>        | 2.47        | 1                                            | BC020750      | <i>SDS</i>          | 8.09        |
| 24                                              | NM_003749     | <i>IRS2</i>        | 2.37        | 2                                            | NM_005101     | <i>G1P2</i>         | 3.58        |
| 25                                              | NM_017631     | <i>FLJ20035</i>    | 2.37        | 3                                            | NM_003733     | <i>OASL</i>         | 3.55        |
| 26                                              | AV699047      | ---                | 2.37        | 4                                            | NM_001300     | <i>KLF6</i>         | 3.30        |
| 27                                              | AI475680      | ---                | 2.34        | 5                                            | NM_024786     | <i>ZDHHC11</i>      | 3.20        |
| 28                                              | AA937109      | <i>FNBP1</i>       | 2.32        | 6                                            | AK093529      | ---                 | 3.08        |
| 29                                              | AW954199      |                    | 2.32        | 7                                            | N55072        | ---                 | 3.03        |
| 30                                              | AK025967      | ---                | 2.31        | 8                                            | NM_006887     | <i>ZFP36L2</i>      | 2.67        |
| 31                                              | NM_016323     | <i>HERC5</i>       | 2.28        | 9                                            | NM_015675     | <i>GADD45B</i>      | 2.45        |
| 32                                              | NM_139266     | <i>STAT1</i>       | 2.27        | 10                                           | BC020765      |                     | 2.45        |
| 33                                              | NM_002581     | <i>PAPPA</i>       | 2.27        | 11                                           | NM_005542     | <i>INSIG1</i>       | 2.36        |
| 34                                              | NM_005242     | <i>F2RL1</i>       | 2.26        | 12                                           | NM_032527     | <i>ZGPAT</i>        | 2.32        |
| 35                                              | BX647703      | ---                | 2.24        | 13                                           | NM_002462     | <i>MX1</i>          | 2.27        |
| 36                                              | AK021801      | ---                | 2.23        | 14                                           | NM_001065     | <i>TNFRSF1A</i>     | 2.27        |
| 37                                              | AK001125      | ---                | 2.23        | 15                                           | BF528646      |                     | 2.22        |
| 38                                              | AV733347      | <i>LOC56902</i>    | 2.22        | 16                                           | AW612461      | ---                 | 2.10        |
| 39                                              | NM_004420     | <i>DUSP8</i>       | 2.21        | 17                                           | NM_001001924  | <i>MTSG1</i>        | 2.07        |
| 40                                              | AK026659      | ---                | 2.21        | 18                                           | NM_005243     | <i>EWSR1</i>        | 2.06        |
| 41                                              | NM_033260     | <i>FOXQ1</i>       | 2.20        | 19                                           | NM_018584     | <i>CaMKIINalpha</i> | 2.06        |
| 42                                              | NM_005139     | <i>ANXA3</i>       | 2.19        | 20                                           | NM_000505     | <i>F12</i>          | 2.03        |
| 43                                              | BE671038      | <i>LRRC16</i>      | 2.19        | 21                                           | NM_002616     | <i>PER1</i>         | 2.02        |
| 44                                              | BF590263      | <i>CSPG2</i>       | 2.17        | 22                                           | U62733        | <i>CPT1B</i>        | 2.02        |
| 45                                              | NM_018362     | <i>LIN7C</i>       | 2.16        | 23                                           | NM_030582     | <i>COL18A1</i>      | 2.01        |
| 46                                              | NM_004117     | <i>FKBP5</i>       | 2.15        | 24                                           | NM_005178     | <i>BCL3</i>         | 2.00        |
| 47                                              | NM_003045     | <i>SLC7A1</i>      | 2.13        | 25                                           | AA777349      | ---                 | 2.00        |
| 48                                              | AK074440      | ---                | 2.13        | 26                                           | BC006435      | ---                 | 2.00        |

## HEP-14-0692\_S6

|    |           |                |      |    |           |                               |       |
|----|-----------|----------------|------|----|-----------|-------------------------------|-------|
| 49 | NM_004864 | <i>GDF15</i>   | 2.12 | 27 | NM_019063 | <i>EML4</i>                   | 2.00  |
| 50 | AV715309  | ---            | 2.11 | 28 | NM_002432 | <i>MNDA</i>                   | -2.83 |
| 51 | NM_005257 | <i>GATA6</i>   | 2.10 | 29 | NM_016613 | <i>DKFZp586G0123/SLC25A24</i> | -2.44 |
| 52 | AK091504  | <i>SFX3</i>    | 2.10 | 30 | NM_197947 | <i>CLECSF12</i>               | -2.33 |
| 53 | NM_001122 | <i>ADFP</i>    | 2.10 | 31 | AL833097  |                               | -2.31 |
| 54 | NM_030674 | <i>SLC38A1</i> | 2.09 | 32 | AI741439  | <i>SLC8A1</i>                 | -2.29 |
| 55 | NM_004867 | <i>ITM2A</i>   | 2.07 | 33 | NM_016613 | <i>DKFZp434L142</i>           | -2.25 |
| 56 | NM_001547 | <i>IFIT2</i>   | 2.07 | 34 | NM_007115 | <i>TNFAIP6</i>                | -2.24 |
| 57 | NM_004244 | <i>CD163</i>   | 2.03 | 35 | BG231961  |                               | -2.22 |
| 58 | NM_032964 | <i>CCL15</i>   | 2.03 | 36 | AI799128  |                               | -2.14 |
| 59 | NM_016114 | <i>ASB1</i>    | 2.02 | 37 | BF438173  | <i>FST</i>                    | -2.11 |
| 60 | AL049435  | ---            | 2.02 | 38 | NM_003916 | <i>AP1S2</i>                  | -2.10 |
| 61 | NM_025074 | <i>FRAS1</i>   | 2.01 | 39 | AI743207  |                               | -2.07 |
| 62 | U73936    | <i>JAG1</i>    | 2.01 | 40 | AI732988  |                               | -2.04 |
| 63 | NM_015066 | <i>TRIM35</i>  | 2.01 | 41 | NM_020117 | <i>LARS</i>                   | -2.02 |
| 64 | AK000850  |                | 2.01 | 42 | AI743123  |                               | -2.02 |
| 65 | AW297731  |                | 2.01 | 43 | NM_015173 | <i>TBC1D1</i>                 | -2.02 |
| 66 | AI806747  | ---            | 2.00 | 44 | AI949827  | <i>NFE2L3</i>                 | -2.01 |

A total of 130 genes differentially expressed more than 2 fold between the two groups of liver samples containing HCV-high and HCV-low viral loads were identified as described in Supporting Fig. 1. Eighty-seven genes were from 5-to-5 comparisons of patients with chronic hepatitis without liver cirrhosis, and 44 genes were from 7-to-3 comparisons of patients with chronic hepatitis with liver cirrhosis (Supporting Table 2). *OASL* with gray shading overlaps in the two comparisons. Positive and negative values of the fold change indicate up-regulation and down-regulation, respectively, in the livers with high HCV loads compared with those with low HCV loads.

**Supporting Table 4. Primer sequences**

| Experiment          | Accession No. | Gene symbol                                 | Primer sequence (5'-3') <sup>a</sup><br>forward (upper) / reverse (lower)                         |
|---------------------|---------------|---------------------------------------------|---------------------------------------------------------------------------------------------------|
| HCV<br>quantitation |               | HCV type 1b                                 | GACCAAGCTCAAACCTCACTC<br>GCACGAGACAGGCTGTGATA                                                     |
| HCV<br>genotyping   |               | (1 <sup>st</sup> PCR)                       | CGCGCGACDAGGAAGACTTC<br>ATGTACCCCATGAGGTCGGC<br>AGGAAGACTTCSGAGCGRTC<br>TGCCTTGGGGATAGGCTGAC (1a) |
|                     |               | (2 <sup>nd</sup> PCR)                       | GAGCCATCCTGCCACCCCA (1b)<br>CCAAGAGGGACGGGAACCTC (2a)<br>ACCCTCGTTTCCGTACAGAG (2b)                |
| Internal<br>control | NM_002046.4   | 18S rRNA                                    | AAACGGCTACCACATCCAAG<br>CCTCCAATGGATCCTCGTTA                                                      |
|                     |               | GAPDH                                       | GGTCGGAGTCAACGGATTTG<br>GGATCTCGCTCCTGGAAGAT                                                      |
|                     |               | RPL34                                       | GCACCAAATCTGCATGTG<br>GCCCTGCTGACATGTTTCTT                                                        |
| Validation          | NM_002122     | HLA-DQA1                                    | CACCCGGCTACCTAATTCC<br>CCCTGGATGAAAGATGGAAA                                                       |
|                     | NM_003733     | OASL                                        | CGTGGCAGAAGGGTACAGAT<br>AAGGGTTCACGATGAGGTTG                                                      |
|                     | NM_005909     | MAP1B                                       | CTGGATGACATCAGCAATGG<br>AGGGGTTTCGTGTTGTCTTTG                                                     |
|                     | NM_005656     | TMPRSS2 <sup>b</sup>                        | CACTGTGCATCACCTTGACC<br>ACACACCGATTCTCGTCCTC                                                      |
|                     | NM_005656     | TMPRSS2 <sup>c</sup>                        | ATGGCTTTGAACTCAGGGTC<br>TTAGCCGTCTGCCCTCATTT                                                      |
|                     | NM_002993     | CXCL6                                       | TGTTTACGCGTTACGCTGAG<br>GACAAACTTGCTTCCCGTTC                                                      |
|                     | NM_003068     | SNAI2                                       | CTTTTTCTTGCCCTCACTGC<br>ACAGCAGCCAGATTCCTCAT                                                      |
|                     | NM_006403     | NEDD9                                       | AAGCCCTCTCAGAGCCTACC<br>GCGTTGAGAAGGGAAATGAA                                                      |
| NM_001549           | IFIT3         | GAACATGCTGACCAAGCAGA<br>CAGTTGTGTCCACCCTTCT |                                                                                                   |

|           |                  |                                               |
|-----------|------------------|-----------------------------------------------|
| NM_002353 | TACSTD2          | ACCTCCAAGTGTCTGCTGCT<br>GTCGTAGAGGCCATCGTTGT  |
| NM_001565 | CXCL10           | ACCGTACGCTGTACCTGCAT<br>TCTTGATGGCCTTCGATTCT  |
| NM_002303 | LEPR             | TCCCATATCTGAGCCCAAAG<br>CTGCTTTCACACTGGATGGA  |
| BF724558  |                  | TGCCACTCTTCAAAGGCTTC<br>GACCCGGAGAGCTGTTTCTT  |
| NM_152878 | MAFF             | AAACCTGGGTGTCCTCACTG<br>CCATCCGTGTCACCTTCTCT  |
| NM_017631 | DDX60            | GGTCAAGACCTGATGGGAGA<br>TTTGCCTTGGTATCCTCTGG  |
| AV699047  | LOC1004227<br>37 | GCTGGGATGACAAGGAAGAC<br>ATTCTGCCCCACCCTAAAAC  |
| AK021801  |                  | AGCCAGTTTGCAGTCAGTGTT<br>GAGGCAACATGAACCAGGAG |
| NM_018362 | LIN7C            | ACAGAAGAGGGCCTTGGATT<br>CCCCCATGTCTATCAGCAAT  |
| U73936    | JAG1             | GACTCATCAGCCGTGTCTCA<br>TGGGGAACACTCACACTCAA  |
| AK000850  |                  | GGGTAGAAGCCGTCATGTGT<br>AGCAATCTGCTTTTGGCACT  |
| N80145    |                  | CACCTTGGATGACGAAACAA<br>GAGTTTCTGGGAAGGCAAAA  |
| AB019490  | RABGAP1L         | TCCAAGCTGCGAAAACTCT<br>TTCAAAGGGACACCAGGAAG   |
| NM_006887 | ZFP36L2          | GTGCAAGTACGGCGAAAAGT<br>AGCCGATGGTATGAAAGGTG  |
| NM_005542 | INSIG1           | CCTATCTTTGGGCCTTTGGT<br>TGACGCCTCCTGAGAAAAAT  |
| NM_001065 | TNFRSF1A         | GTGCCTACCCAGATTGAGA<br>TGTCGATTTCCCACAAACAA   |
| NM_003916 | AP1S2            | GTTTCTTTTGGGAGGGGAAG<br>ACACTACGTGGGGTTTCAGC  |
| NM_020240 | CDC42SE2         | CGGCGGATTGACAGAAGTAT<br>ACCTCCATAACCTCCCTTGG  |
| NM_016613 | FAM198B          | TTATCCAGCACCTGTGGTCA<br>CTACAGCAGGGAGCACCTTC  |



|                               |             |                      |                                                 |                                           |
|-------------------------------|-------------|----------------------|-------------------------------------------------|-------------------------------------------|
|                               | AI741439    | SLC8A1               | TCTTGCATTGGTTCGATTTCA<br>GCTGTGCACAATACACACAAAA |                                           |
|                               | NM_013386   | SLC25A24             | TTATCCAGCACCTGTGGTCA<br>CTACAGCAGGGAGCACCTTC    |                                           |
| Transmembrane serine protease | NM_002569.2 | FURIN                | Hs00965485_g1                                   |                                           |
|                               | NM_002151.2 | HPN                  | Hs01056332_m1                                   |                                           |
|                               | NM_005656   | TMPRSS2 <sup>d</sup> | Hs01120965_m1                                   |                                           |
|                               | NM_153609.2 | TMPRSS6              | Hs00542184_m1                                   |                                           |
|                               | NM_182973.1 | TMPRSS9              | Hs01572421_m1                                   | TaqMan gene expression assay <sup>e</sup> |
|                               | NM_021978.3 | ST14                 | Hs01058386_m1                                   |                                           |
|                               | NM_024022.2 | TMPRSS3              | Hs00225101_m1                                   |                                           |
|                               | NM_006587.2 | CORIN                | Hs00198141_m1                                   |                                           |
|                               | NM_019894.3 | TMPRSS4              | Hs00212669_m1                                   |                                           |
|                               | NM_004262.2 | HAT                  | Hs00975370_m1                                   |                                           |
| Control                       |             | GAPDH                | Hs02758991_g1                                   |                                           |

<sup>a</sup> The primer sequences for SYBR green qPCR were designed by primer 3 ([http://frodo.wi.mit.edu/cgi-bin/primer3/primer3\\_www.cgi](http://frodo.wi.mit.edu/cgi-bin/primer3/primer3_www.cgi)).

<sup>b, c</sup> SYBR green qPCR of TMPRSS2 mRNA was performed using primer pair b for human liver (Fig. 1A) and primer pair c for TMPRSS2-expressing cell clones (Fig. 5A and Fig. 6A).

<sup>d</sup> TaqMan gene expression assay (Life Technologies) was used for qPCR of TMPRSS2 mRNA in Huh7-25-CD81 cells (Fig. 4A) and human liver (Supporting Fig. 4) infected with or without HCV.

<sup>e</sup> Assay IDs (Life Technologies) used are shown.

**Supporting Table 5. Twenty-six up-regulated genes in the livers of the HCV-high group**

| Gene symbol    | Gene title                                                                     | Fold change | <i>P</i>     |            | Function                                       |
|----------------|--------------------------------------------------------------------------------|-------------|--------------|------------|------------------------------------------------|
| HLA-DQA1       | Major histocompatibility complex, class II, DQ alpha 1                         | 9.28        | 0.002        | ISG        | Immune response                                |
| OASL           | 2'-5'-Oligoadenylate synthetase-like                                           | 7.27        | 0.0003       | ISG        | Anti-HCV replication                           |
| SNAI2          | snail family zinc finger 2                                                     | 7.03        | 0.004        | EMT        | E-cadherin repressor, anti-apoptosis           |
| (AK021801)     |                                                                                | 4.63        | 0.021        | ncR        | Intron of BICC1 (bicaudal C homolog 1)         |
| NEDD9          | Neural precursor cell expressed, developmentally down-regulated 9              | 3.84        | 0.006        | EMT        | Focal adhesion                                 |
| AP1S2          | adaptor-related protein complex 1, sigma 2 subunit                             | 3.66        | 0.011        |            | Vesicle traffic                                |
| (AK000850)     |                                                                                | 3.36        | 0.004        | ncR<br>EMT | Intron of NEDD9                                |
| <b>TMPRSS2</b> | <b>Transmembrane protease, serine 2</b>                                        | <b>3.31</b> | <b>0.002</b> |            | <b>Proteolysis</b>                             |
| SLC8A1         | Solute carrier family 8 (sodium/calcium exchanger), member 1                   | 3.11        | 0.011        |            | Na <sup>+</sup> /Ca <sup>2+</sup> exchanger    |
| MAP1B          | Microtubule-associated protein 1B                                              | 2.94        | 0.008        |            | Microtubule stabilization                      |
| LOC100422737   |                                                                                | 2.93        | 0.008        | ncR        | Long non-coding RNA                            |
| MAFF           | V-maf musculoaponeurotic fibrosarcoma oncogene homolog F (avian)               | 2.82        | 0.002        |            | Cellular stress response                       |
| SLC25A24       | Solute carrier family 25 (mitochondrial carrier; phosphate carrier), member 24 | 2.73        | 0.046        |            | Calcium-dependent mitochondrial solute carrier |
| DDX60          | DEAD (Asp-Glu-Ala-Asp) box polypeptide 60                                      | 2.72        | 0.002        | ISG        | Anti-viral helicase                            |
| (N80145)       |                                                                                | 2.69        | 0.027        | ncR        | EST                                            |
| LEPR           | Leptin receptor                                                                | 2.68        | 0.015        |            | Liver fibrosis                                 |
| CXCL10         | Chemokine (C-X-C motif) ligand 10                                              | 2.68        | 0.021        | ISG        | Immune response                                |
| ZFP36L2        | ZFP36 ring finger protein-like 2                                               | 2.65        | 0.002        |            | RNA-binding protein, erythroid self-renewal    |
| (BF724558)     |                                                                                | 2.63        | 0.0006       | ncR        | EST                                            |

|          |                                                           |      |       |            |                                               |
|----------|-----------------------------------------------------------|------|-------|------------|-----------------------------------------------|
| JAG1     | Jagged 1                                                  | 2.59 | 0.027 | ISG<br>EMT | Notch 1 ligand                                |
| TACSTD2  | Tumor-associated calcium signal transducer 2              | 2.58 | 0.006 |            | Cell surface Ca signal transducer             |
| IFIT3    | Interferon-induced protein with tetratricopeptide repeats | 2.47 | 0.027 | ISG        | TBK1 activation-mediated IRF3 phosphorylation |
| KLF6     | Kruppel-like factor 6                                     | 2.29 | 0.008 | ISG        | Tumor suppressor, carcinogenesis              |
| LIN7C    | Lin-7 homolog C (C. elegans)                              | 2.19 | 0.036 |            | Cell-cell adhesion, tumor suppressor          |
| TNFRSF1A | Tumor necrosis factor receptor superfamily, member 1A     | 2.07 | 0.027 |            | Inflammation, apoptosis                       |
| FAM198B  | Family with sequence similarity 198, member B             | 1.98 | 0.046 |            | unknown                                       |

Twenty-six genes differentially expressed between the two groups of liver samples containing HCV-high and HCV-low viral loads were identified and validated as described in Supporting Fig. 1. The Mann-Whitney U test was performed to analyze the two-group comparisons, and *P* values (<0.05) are shown. A name in parentheses in the gene symbol column indicates the accession number of the gene. Six genes with gray shading overlap with previous studies that compared HCV-negative and -positive livers.<sup>3-7</sup> ISG, IFN-stimulating genes listed in Interferome v2.01<sup>8</sup>; EMT, epithelial mesenchymal transition; ncR, non-coding RNA; EST, expression sequence tag.

## Supporting Figures

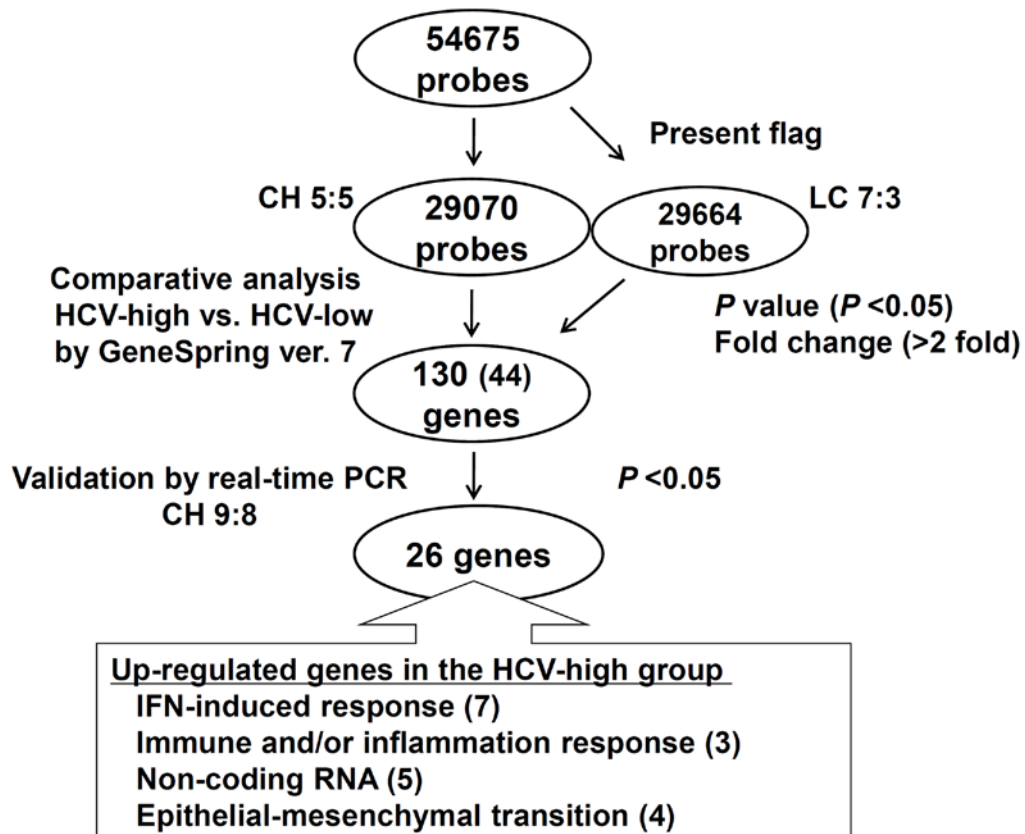

**Supporting Fig. 1.** Summary of comparative study of comprehensive gene expression between two groups of chronic hepatitis livers with HCV-high (n=5) and HCV-low (n=5) viral loads. We also performed a comparative gene expression study as a reference between two groups of cirrhotic livers with HCV-high (n=7) and HCV-low (n=3) viral loads. Gene expression in the 20 human liver tissues was analyzed using the Human Genome U133 Plus 2.0 array, which contains 54,675 probe sets (Affymetrix). Gene expression call (present/absent) was calculated from raw data with GeneChip Operating Software 1.0 (GCOS, Affymetrix). Then, we compared the gene expression profiles statistically with Gene Spring version 7 (Agilent Technologies, Santa

Clara, CA). At first, the output data were normalized per chip and per gene, and then, all 54,675 probes were filtered with at least one present flag in 10 samples each. We obtained 29,070 and 29,664 probes as targets for comparison, respectively. After filtering probes that were significantly differentially expressed by more than 2 fold between the two groups ( $P < 0.05$  by Student's T test, Welch's T test and the parametric analysis based on cross-gene error model), we obtained 130 genes as candidate differentially expressed genes (Supporting Table 3); 87 and 44 genes were from each comparison, and one gene, OASL, overlapped. After validation of the representative probes using qPCR in 9-to-8 comparisons of chronic hepatitis livers without liver cirrhosis, 26 genes were identified as up-regulated in the HCV-high group of chronic hepatitis (Supporting Table 5). The qPCR of gene expression was normalized against 18S rRNA, which was the most consistently expressed gene in all patients' samples, compared to GAPDH and ribosomal protein L34 (RPL34) mRNAs. One half of the genes are ISGs, or related to the immune response, inflammation and EMT. Five noncoding RNAs of unknown function were also present in the up-regulated genes in the HCV-high group (Supporting Table 5). CH, chronic hepatitis without liver cirrhosis; LC, liver cirrhosis.

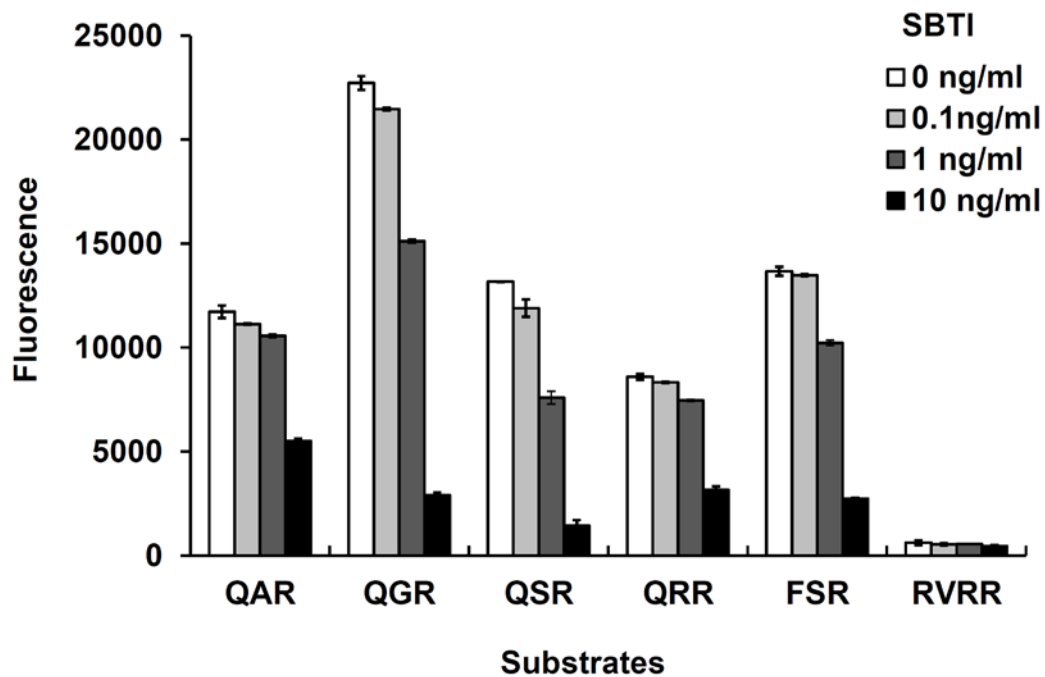

**Supporting Fig. 2.** Assessment of the inhibition of trypsin by SBTI using synthetic peptides as substrates. The reaction mixture of 100  $\mu$ M peptide substrate, 10 ng/mL of trypsin and various concentrations (0, 0.1, 1, 10ng/mL) of SBTI in 200  $\mu$ L Opti-MEM were prepared in 96-well black plates. Immediately after the trypsin was added, the fluorescence released was measured every 15 minutes for 3 hours at 28°C. The enzyme activity was linearly increased in a time-dependent manner and in a dose-dependent manner in the previous experiment (data not shown). The fluorescence was released for 60 minutes. Trypsin targeted five peptides except for RVRR, and SBTI inhibited all cleavage activity in a dose-dependent manner. The inhibition rate was slightly variable among substrate peptides.

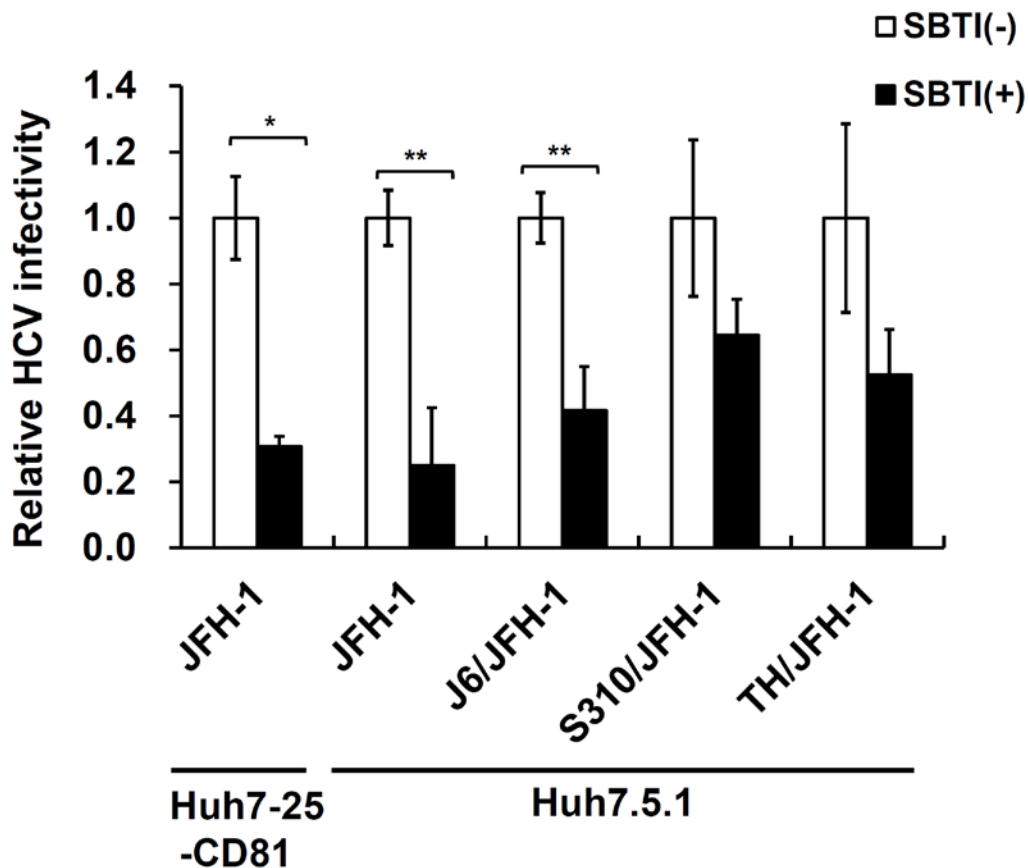

**Supporting Fig. 3.** Infectivity of various HCVcc in the presence of SBTI.

Huh7.5.1 cells ( $4 \times 10^4$ ) pre-cultured for 1 day, were inoculated with 300 focus-forming units of various HCVcc in the presence of 1 mg/mL SBTI. After 2 hours, the inoculum was removed and the cells were cultured in fresh complete medium for 2 days. The HCV infectivity was determined as described in Fig. 2, and the control experiment in the absence of SBTI was expressed as 1.0. The experiment was performed in triplicate, and the result is expressed as the mean  $\pm$  SD. J6/JFH1<sup>9</sup>, S310/JFH1<sup>10</sup> and TH/JFH1<sup>11</sup> were chimeric, JFH-1 HCVcc-containing structural genes of genotype 2a, 3a and 1b, respectively. \* and \*\*,  $P < 0.05$  and  $P < 0.01$  by the Student's t-test, respectively.

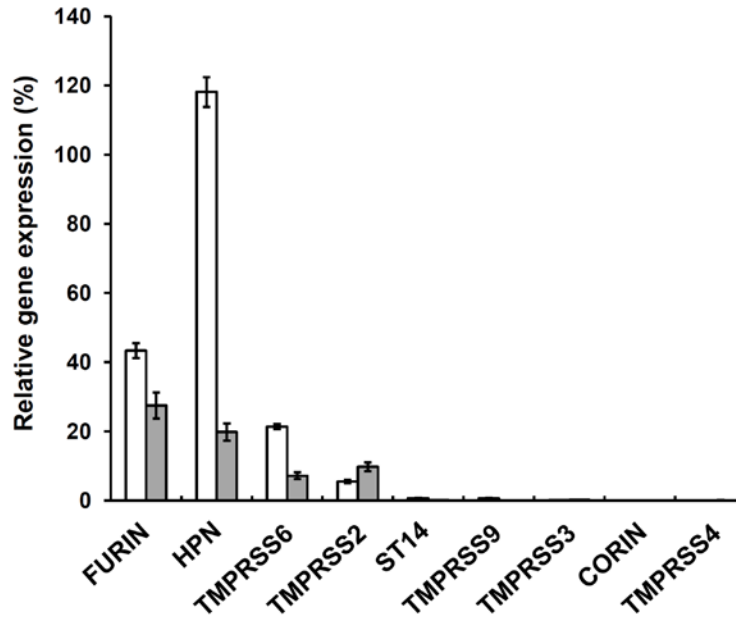

**Supporting Fig. 4.** mRNA expression of transmembrane serine proteases in human liver tissues with and without HCV infection. The mRNA levels of nine transmembrane serine proteases were quantified by qPCR. The expression was normalized to GAPDH expression by a relative quantitation method. The relative gene expression was expressed as a percentage ratio of the expression of the target gene to that of GAPDH. Open bar, average of 4 samples of HCV-negative normal livers from patients with hepatic metastasis of colon cancer; closed bar, average of 4 samples of chronic hepatitis livers without liver cirrhosis containing HCV-high viral load; error bar, SE.



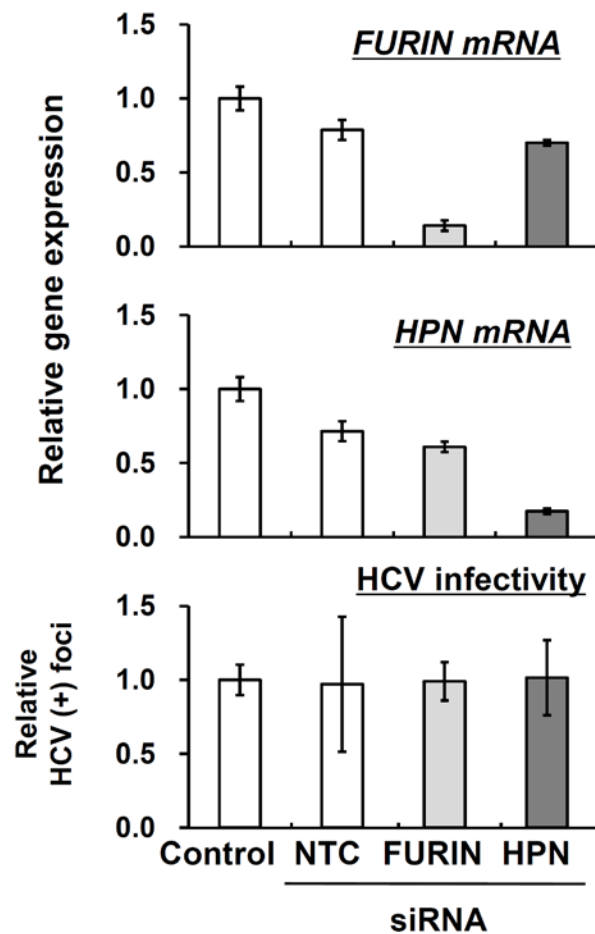

**Supporting Fig. 5.** HCV infectivity after knockdown of FURIN and HPN with siRNA. (Upper and middle panels) FURIN and HPN mRNA were quantified by qPCR 2 days after transfection of 20 nM of siRNA (ON-TARGETplus SMARTpool, Dharmacon). The gene expression was normalized to GAPDH expression as described in Fig. 4A. The relative gene expression was expressed as a ratio to the control experiment. (Lower panel) The cells, 2 days post-transfection with siRNA, were inoculated with HCVcc for 2 hours. Then, the HCV infectivity was determined as described in Fig. 2, and the relative infectivity is expressed as a ratio to the control experiment. The results of two experiments are expressed as the mean  $\pm$  SD. Control, no transfection; NTC, non-targeting control siRNA.

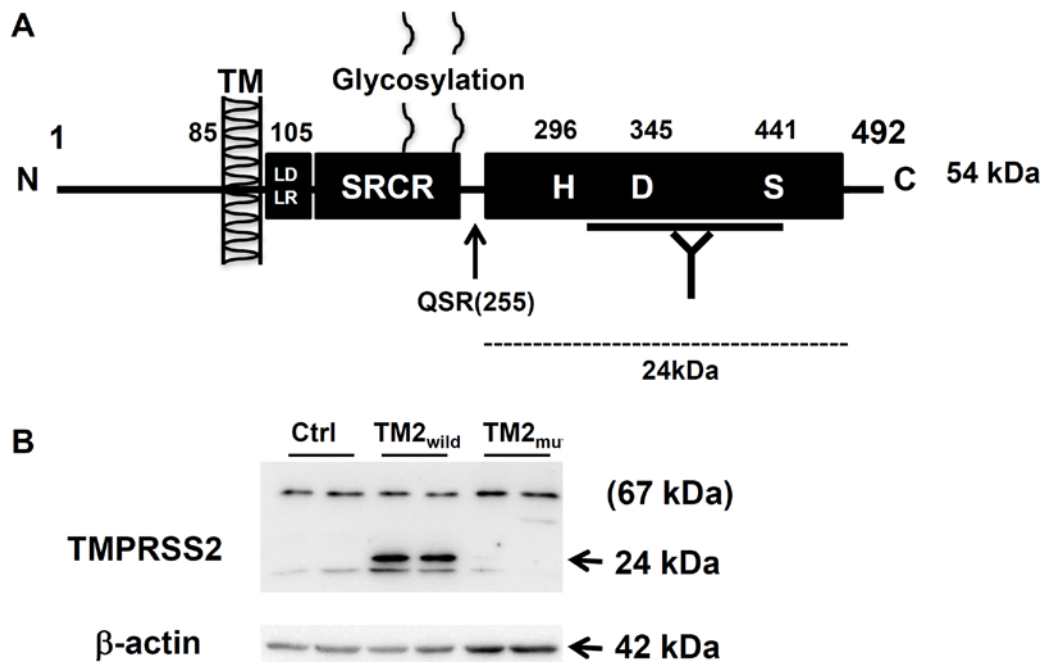

**Supporting Fig. 6.** Immunoblotting of TMPRSS2 produced in TMPRSS2-wild type and TMPRSS2-mutant cell clones. (A) Structure of TMPRSS2 protein and the recognition site of the anti-TMPRSS2 antibody used. TMPRSS2 is a type II transmembrane serine protease and is thought to be activated by auto-cleavage at the C terminus of R255. QSR is the amino acid sequence of positions 3, 2 and 1 at the cleavage site. The antibody recognizes the C terminal active site (catalytic triad HDS) of trypsin-like serine protease. TM, transmembrane domain from aa 85 to aa 105; LDLR, low density lipoprotein receptor class A domain; SRCR, scavenger receptor cysteine-rich domain. (B) Immunoblotting of TMPRSS2. Fifty micrograms of protein extracted from the cells was subjected to sodium dodecyl sulfate-10% polyacrylamide gel electrophoresis and blotted onto a polyvinylidene fluoride membrane. A protein band of 24 kDa was detected specifically in TMPRSS2-wild type clone cells, but not in TMPRSS2-mutant clone cells with 0.1  $\mu\text{g/ml}$  of anti-TMPRSS2 rabbit IgG (ATLAS Antibodies,

Stockholm, Sweden) followed by 0.04 µg/ml of horse radish peroxidase-conjugated anti-rabbit IgG goat IgG Fab' (Immuno-Biological Laboratories, Gunma, Japan). The chemiluminescence was detected with an ImmunoStar LD reagent (Wako Pure Chemical Industries, Osaka, Japan) and a Light Capture (ATTO, Tokyo, Japan). A band of 67 kDa was nonspecific and TMPRSS2-mutant cells had no specific signal for TMPRSS2. Therefore, S441A is unreactive with the antibody, or non-cleaved TMPRSS2 is unreactive with the antibody. Beta-actin as a loading control was detected with 0.2 µg/ml of anti-β-actin mouse IgG (Abcam, Cambridge, UK), followed by 0.02 µg/ml of horse radish peroxidase-conjugated anti-mouse IgG goat IgG Fab' (Immuno-Biological Laboratories).

**References**

1. Ichida F, Tsuji T, Omata M, Ichida T, Inoue K, Kamimura T, et al. New Inuyama classification; new criteria for histological assessment of chronic hepatitis. *Int Hepatol Commun* 1996;6:112-119.
2. Okamoto H, Sugiyama Y, Okada S, Kurai K, Akahane Y, Sugai Y, et al. Typing hepatitis C virus by polymerase chain reaction with type-specific primers: application to clinical surveys and tracing infectious sources. *J Gen Virol* 1992;73 ( Pt 3):673-679.
3. Bigger CB, Brasky KM, Lanford RE. DNA microarray analysis of chimpanzee liver during acute resolving hepatitis C virus infection. *J Virol* 2001;75:7059-7066.
4. Bigger CB, Guerra B, Brasky KM, Hubbard G, Beard MR, Luxon BA, et al. Intrahepatic gene expression during chronic hepatitis C virus infection in chimpanzees. *J Virol* 2004;78:13779-13792.
5. Bieche I, Asselah T, Laurendeau I, Vidaud D, Degot C, Paradis V, et al. Molecular profiling of early stage liver fibrosis in patients with chronic hepatitis C virus infection. *Virology* 2005;332:130-144.
6. Helbig KJ, Lau DT, Semendric L, Harley HA, Beard MR. Analysis of ISG expression in chronic hepatitis C identifies viperin as a potential antiviral effector. *Hepatology* 2005;42:702-710.
7. De Giorgi V, Monaco A, Worchech A, Tornesello M, Izzo F, Buonaguro L, et al. Gene profiling, biomarkers and pathways characterizing HCV-related hepatocellular carcinoma. *J Transl Med* 2009;7:85.
8. Rusinova I, Forster S, Yu S, Kannan A, Masse M, Cumming H, et al. Interferome v2.0: an updated database of annotated interferon-regulated genes. *Nucleic Acids Res* 2013;41:D1040-1046.
9. Date T, Kato T, Kato J, Takahashi H, Morikawa K, Akazawa D, et al. Novel

cell culture-adapted genotype 2a hepatitis C virus infectious clone. *J Virol* 2012;86:10805-10820.

10. Kim S, Date T, Yokokawa H, Kono T, Aizaki H, Maurel P, et al. Development of hepatitis C virus genotype 3a cell culture system. *Hepatology* 2014.
11. Takebe Y, Saucedo CJ, Lund G, Uenishi R, Hase S, Tsuchiura T, et al. Antiviral lectins from red and blue-green algae show potent in vitro and in vivo activity against hepatitis C virus. *PLoS One* 2013;8:e64449.
